# Supplementary material for: Synthesis and characterization of gold complexes with pyridine-based SNS ligands and as homogeneous catalysts for reduction of 4-nitrophenol
Source: Royal Society of Chemistry journal article supplement (doi:10.1039/c5ra01749a), 2015-01-01
Supplement: c5ra01749a1.pdf [file c5ra01749a1.pdf]

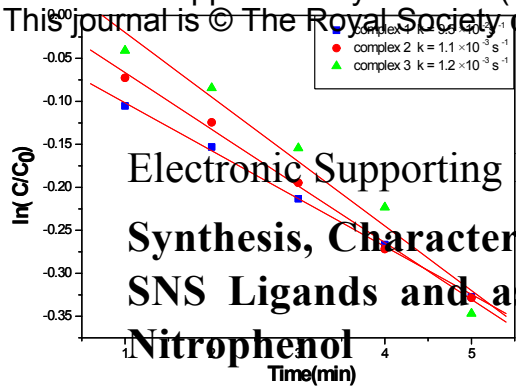

# Electronic Supporting Information for Synthesis, Characterization of Gold Complexes with Pyridine-based SNS Ligands and as Homogeneous Catalysts for Reduction of 4- Nitrophenol

Wei-Guo Jia\*, Yuan-Chen Dai, Hai-Ning Zhang, XiaoJing Lu, En-Hong Sheng

$n(4\text{-NP}):n(\text{NaBH}_4)=1:50$

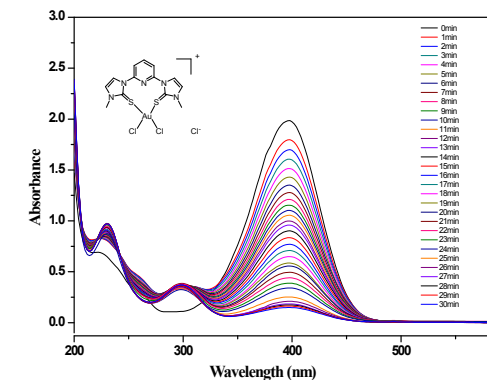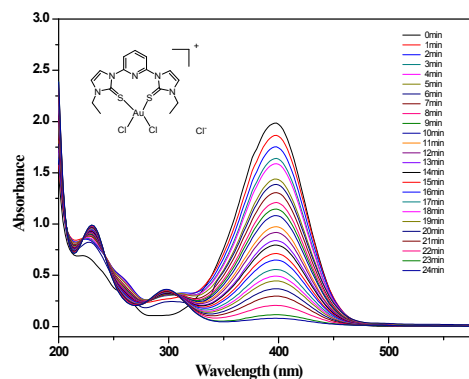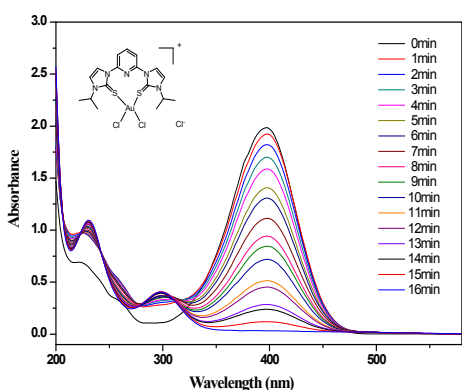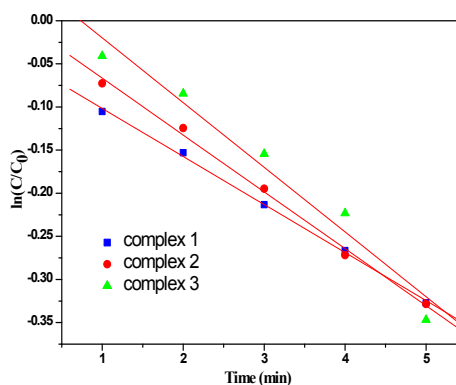

$n(4\text{-NP}):n(\text{NaBH}_4)=1:100$

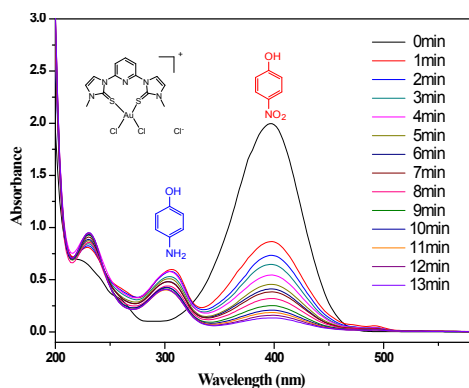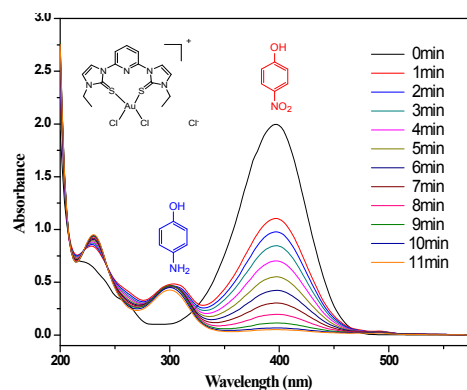

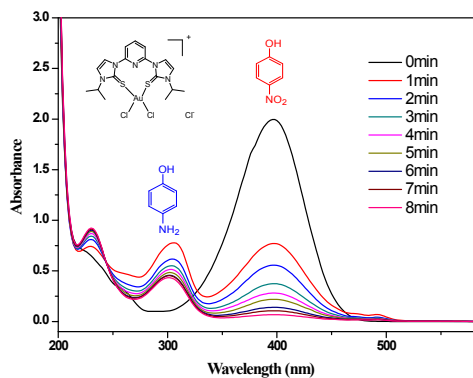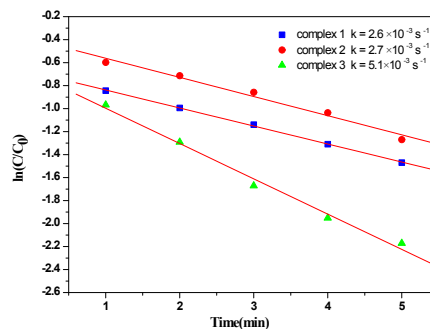

$n(4\text{-NP}):n(\text{NaBH}_4)=1:200$

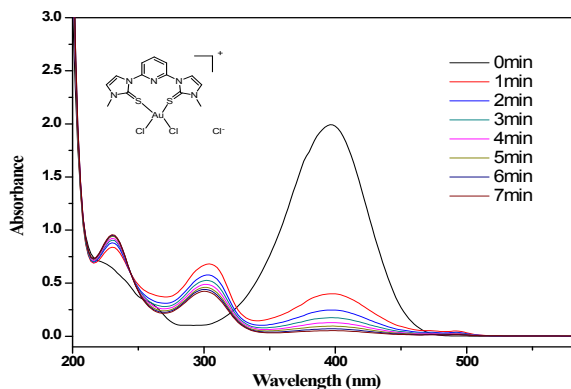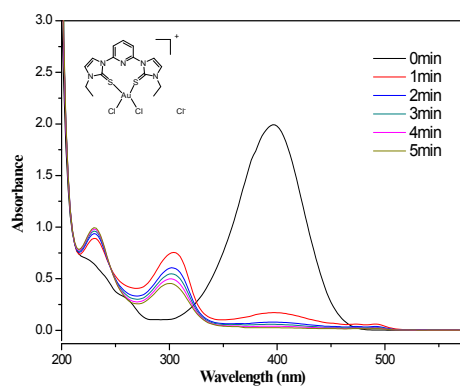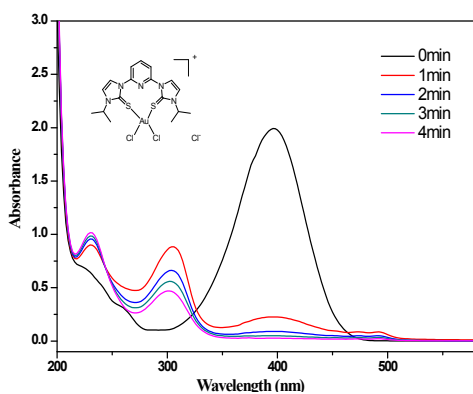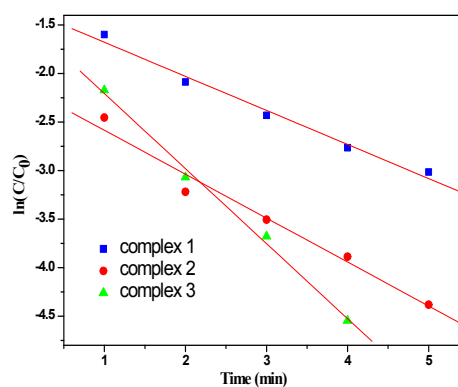

$n(4\text{-NP}):n(\text{NaBH}_4)=1:300$

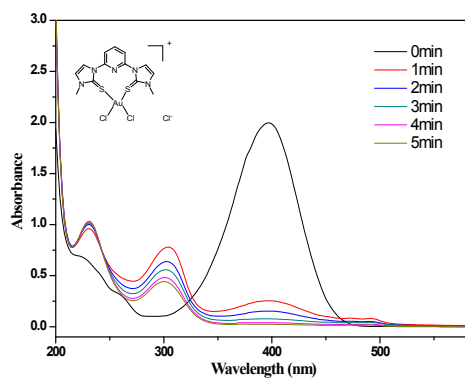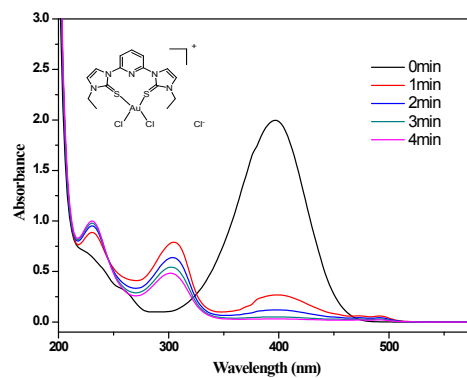

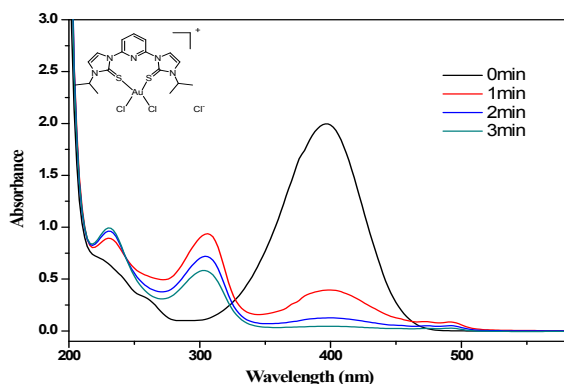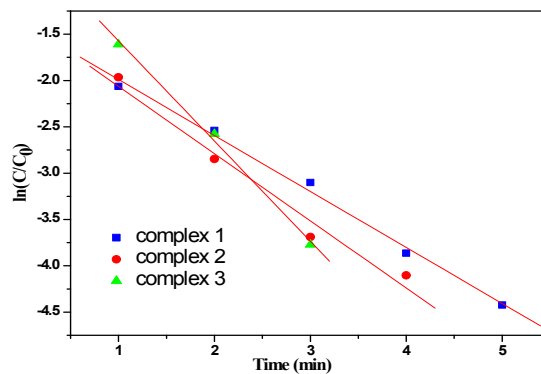

|           | n(4-NP):n(NaBH <sub>4</sub> ) | TOF (min <sup>-1</sup> ) | K (S <sup>-1</sup> ) |
|-----------|-------------------------------|--------------------------|----------------------|
| Complex 1 | 1:50                          | 0.30                     | 9.5×10 <sup>-4</sup> |
| Complex 2 | 1:50                          | 0.40                     | 1.0×10 <sup>-3</sup> |
| Complex 3 | 1:50                          | 0.61                     | 1.2×10 <sup>-3</sup> |
| Complex 1 | 1:100                         | 0.71                     | 2.6×10 <sup>-3</sup> |
| Complex 2 | 1:100                         | 0.88                     | 2.7×10 <sup>-3</sup> |
| Complex 3 | 1:100                         | 1.20                     | 5.1×10 <sup>-3</sup> |
| Complex 1 | 1:200                         | 1.38                     | 5.6×10 <sup>-3</sup> |
| Complex 2 | 1:200                         | 1.97                     | 7.4×10 <sup>-3</sup> |
| Complex 3 | 1:200                         | 2.45                     | 1.2×10 <sup>-2</sup> |
| Complex 1 | 1:300                         | 1.96                     | 1.0×10 <sup>-2</sup> |
| Complex 2 | 1:300                         | 2.46                     | 1.2×10 <sup>-2</sup> |
| Complex 3 | 1:300                         | 3.27                     | 1.7×10 <sup>-2</sup> |
